# Supplementary material
Source: Springer Nature journal article supplement (https://www.springermedizin.de/resource/supplementary/12913_2014_3403_MOESM2_ESM.pdf/9532756)

# Appropriate Quality of Care

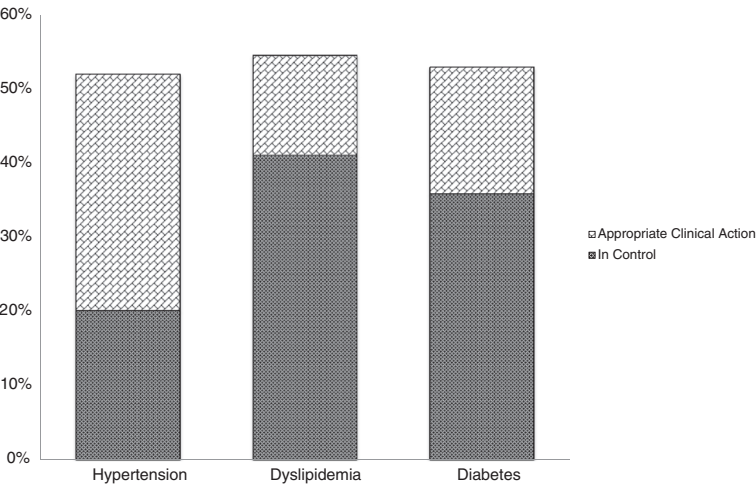

Supplement: MOESM2 [file 9532756]
